# Supplementary material
Source: PubMed Central journal article supplement (PMC5734674)

## **SUPPLEMENTAL MATERIAL**

**Supplementary table 1. Number of children and the corresponding number of aortic stenosis cases.**

| Nr of children | Number of siblings with AS |       |      |      | Total (N)<br>Percentage of total AS cases |
|----------------|----------------------------|-------|------|------|-------------------------------------------|
|                | 1                          | 2     | 3    | 4    |                                           |
| <b>2</b>       | 5539                       | 138   | 0    | 0    | 5677                                      |
|                | 41.21                      | 1.03  | 0.00 | 0.00 | 42.23%                                    |
|                | 97.57                      | 2.43  | 0.00 | 0.00 |                                           |
| <b>3</b>       | 3618                       | 180   | 3    | 0    | 3801                                      |
|                | 26.92                      | 1.34  | 0.02 | 0.00 | 28.28%                                    |
|                | 95.19                      | 4.74  | 0.08 | 0.00 |                                           |
| <b>4</b>       | 1857                       | 116   | 3    | 0    | 1976                                      |
|                | 13.81                      | 0.86  | 0.02 | 0.00 | 14.70%                                    |
|                | 93.98                      | 5.87  | 0.15 | 0.00 |                                           |
| <b>5</b>       | 880                        | 78    | 6    | 0    | 964                                       |
|                | 6.55                       | 0.58  | 0.04 | 0.00 | 7.17%                                     |
|                | 91.29                      | 8.09  | 0.62 | 0.00 |                                           |
| <b>6</b>       | 441                        | 36    | 3    | 0    | 480                                       |
|                | 3.28                       | 0.27  | 0.02 | 0.00 | 3.57%                                     |
|                | 91.88                      | 7.50  | 0.63 | 0.00 |                                           |
| <b>7</b>       | 215                        | 24    | 9    | 0    | 248                                       |
|                | 1.60                       | 0.18  | 0.07 | 0.00 | 1.84%                                     |
|                | 86.69                      | 9.68  | 3.63 | 0.00 |                                           |
| <b>8</b>       | 113                        | 26    | 0    | 4    | 143                                       |
|                | 0.84                       | 0.19  | 0.00 | 0.03 | 1.06%                                     |
|                | 79.02                      | 18.18 | 0.00 | 2.80 |                                           |
| <b>9</b>       | 61                         | 4     | 6    | 0    | 71                                        |
|                | 0.45                       | 0.03  | 0.04 | 0.00 | 0.53%                                     |
|                | 85.92                      | 5.63  | 8.45 | 0.00 |                                           |
| <b>10</b>      | 42                         | 4     | 0    | 0    | 46                                        |
|                | 0.31                       | 0.03  | 0.00 | 0.00 | 0.34%                                     |
|                | 91.30                      | 8.70  | 0.00 | 0.00 |                                           |
| <b>11</b>      | 19                         | 10    | 0    | 0    | 29                                        |
|                | 0.14                       | 0.07  | 0.00 | 0.00 | 0.22%                                     |
|                | 65.52                      | 34.48 | 0.00 | 0.00 |                                           |

|              |                     |                   |                   |                   |                  |
|--------------|---------------------|-------------------|-------------------|-------------------|------------------|
| <b>12</b>    | 4<br>0.03<br>100.00 | 0<br>0.00<br>0.00 | 0<br>0.00<br>0.00 | 0<br>0.00<br>0.00 | 4<br>0.03%<br>   |
| <b>13</b>    | 2<br>0.01<br>100.00 | 0<br>0.00<br>0.00 | 0<br>0.00<br>0.00 | 0<br>0.00<br>0.00 | 2<br>0.01%<br>   |
| <b>14</b>    | 1<br>0.01<br>100.00 | 0<br>0.00<br>0.00 | 0<br>0.00<br>0.00 | 0<br>0.00<br>0.00 | 1<br>0.01%<br>   |
| <b>Total</b> | 12792<br>95.16      | 616<br>4.58       | 30<br>0.22        | 4<br>0.03         | 13442<br>100.00% |

**Supplementary Table 2. Number of AS cases by ICD-code.**

|                                                                            | Events |      | Median<br>age | Mean age    |
|----------------------------------------------------------------------------|--------|------|---------------|-------------|
|                                                                            | No.    | %    |               |             |
| Total events                                                               | 13442  |      | 61            | 55.2 ± 18.9 |
| Aortic valvular stenosis (I35.0)                                           | 9103   | 67.7 | 64            | 61.8 ± 10.6 |
| Aortic valvular stenosis with<br>aortic regurgitation (I35.2)              | 2469   | 18.4 | 60            | 57.3 ± 12.8 |
| Rheumatic aortic valvular<br>stenosis (I06.0)                              | 120    | 0.9  | 60            | 57.5 ± 10.4 |
| Rheumatic aortic valvular<br>stenosis with aortic<br>regurgitation (I06.2) | 109    | 0.8  | 58            | 54.7 ± 13.5 |
| Congenital aortic valvular<br>stenosis (Q23.0)                             | 1641   | 12.2 | 12            | 15.3 ± 14.3 |

**Supplementary table 3. Risk of aortic stenosis with a sibling history of AS, excluding congenital AS.**

| N   | HR   | 95% CI      |
|-----|------|-------------|
| 620 | 3.58 | 2.33 – 5.49 |

Adjusted for gender, birth year, and family size. Cases of congenital AS (ICD-10 Q230) were excluded.

**Supplementary Table 4. Risk of AS with a sibling history of AS stratified by age.**

| Age at diagnosis | N   | HR   | 95% CI       |
|------------------|-----|------|--------------|
| <20              | 17  | 9.61 | 4.14 - 22.34 |
| 20-39            | 6   | 1.91 | 0.60 - 6.07  |
| 40-49            | 23  | 2.47 | 1.15 - 5.32  |
| 50-59            | 122 | 3.15 | 1.85 - 5.36  |
| 60-69            | 314 | 3.12 | 1.97 - 4.96  |
| ≥70              | 169 | 3.04 | 1.84 - 5.03  |

Adjusted for gender, birth year, and family size, and comorbidities. AS: Aortic stenosis. N: number of AS cases.

**Supplementary Table 5. Number of cases and incidence rate of AS by birth****order**

| Birth order    | Population |       | AS events |       | Incidence rate*            |
|----------------|------------|-------|-----------|-------|----------------------------|
|                | No.        | %     | No.       | %     | (per 100 000 person years) |
| First          | 2410115    | 39.4  | 4967      | 37.0  | 26.1                       |
| Second         | 2410115    | 39.4  | 4870      | 36.2  | 25.9                       |
| Third          | 882931     | 14.4  | 2107      | 15.7  | 26.4                       |
| Fourth         | 261649     | 4.3   | 862       | 6.4   | 27.0                       |
| Fifth or later | 152453     | 2.5   | 636       | 4.7   | 29.5                       |
| All            | 6117263    | 100.0 | 13442     | 100.0 | 26.2                       |

\*: Adjusted for European standardized population

**Supplementary Figure 1. Kaplan-Meier curves for visual inspection of the proportional hazards assumption.**

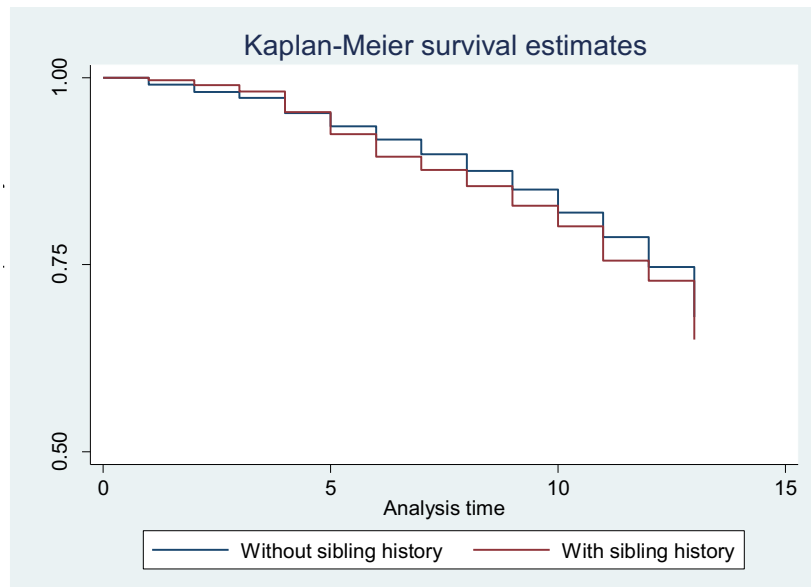

Supplement: NIHMS918121-supplement-001742_-_Supplemental_material.pdf [file NIHMS918121-supplement-001742_-_Supplemental_material.pdf]
